# Supplementary material for: Identification of SARS-CoV-2 Main Protease Inhibitors Using Chemical Similarity Analysis Combined with Machine Learning
Source: MDPI journal article supplement (doi:10.3390/ph17020240), 2024-02-12
Supplement: s1 [file s1]

**Table S1. Reference compounds for computational screening**

| Compound         | Use           | Activity on                                | Evidence       | Reference |
|------------------|---------------|--------------------------------------------|----------------|-----------|
| Acetophenazina   | Antipsychotic | SARS-CoV                                   | In vitro-cells | [50]      |
| Aloxistatin      | Research      | HCoV-OC43, HCoV-NL63,<br>MERS-CoV, MHV-A59 | In vitro-cells | [52,57]   |
| Amodiaquine      | Antimalarial  | MERS-CoV, SARS-CoV                         | In vitro-cells | [52,57]   |
| Anisomycin       | Research      | MERS-CoV, SARS-CoV                         | In vitro-cells | [52,57]   |
| Arbidol          | Antiviral     | MERS-CoV, SARS-CoV                         | In vitro-cells | [52]      |
| Astemizole       | Antihistamine | SARS-CoV-2                                 | In vitro-cells | [52,57]   |
| Baicalin         | Research      | MERS-CoV, SARS-CoV                         | In vitro-cells | [52,57]   |
| Baricitinib      | Antirheumatic | SARS-CoV                                   | In vitro-cells | [50]      |
| Chlorogenic acid | Research      | MERS-CoV, SARS-CoV                         | In vitro-cells | [52]      |
| Chloroquine      | Antimalarial  | MERS-CoV, SARS-CoV                         | In vitro-cells | [52]      |
| Chlorphenoxamine | Retired       | SARS-CoV                                   | In vitro-cells | [52,57]   |
| Chlorpromazine   | Antipsychotic | SARS-CoV                                   | In vitro-cells | [52]      |

|               |                |                                            |                |             |
|---------------|----------------|--------------------------------------------|----------------|-------------|
| Cinanserin    | Research       | MERS-CoV, SARS-CoV                         | In vitro-cells | [52,57]     |
| Clomipramine  | Antidepressant | MERS-CoV, SARS-CoV                         | In vitro-cells | [52,57]     |
| Cycloheximide | Research       | MERS-CoV                                   | In vitro-cells | [52,53, 57] |
| Cytarabine    | Antineoplastic | MERS-CoV, SARS-CoV                         | In vitro-cells | [52,53, 57] |
| Darunavir     | Antiviral      | MERS-CoV, SARS-CoV                         | In vitro-cells | [52,57]     |
| Dasatinib     | Antineoplastic | SARS-CoV-2                                 | In vitro-cells | [52,57]     |
| Dosulepin     | Antidepressant | MERS-CoV                                   | In vitro-cells | [54]        |
| Emetin        | Research       | HCoV-OC43, HCoV-NL63,<br>MERS-CoV, MHV-A59 | In vitro-cells | [52,57]     |
| Favipiravir   | Antiviral      | SARS-CoV-2                                 | In vitro-cells | [56]        |
| Fluphenazine  | Antipsychotic  | HCoV-OC43, HCoV-NL63,<br>MERS-CoV, MHV-A59 | In vitro-cells | [50]        |
| Fluspirilene  | Antipsychotic  | MERS-CoV, SARS-CoV                         | In vitro-cells | [52,57]     |
| Gemcitabine   | Antineoplastic | MERS-CoV, SARS-CoV                         | In vitro-cells | [52]        |
| Glycyrrhizin  | Sweetener      | MERS-CoV, SARS-CoV                         | In vitro-cells | [52,57]     |

|                    |                     |                                            |                |         |
|--------------------|---------------------|--------------------------------------------|----------------|---------|
| Hydroxychloroquine | Antimalarial        | SARS-CoV                                   | In vitro-cells | [50]    |
| Hydroxyzine        | Antihistamine       | MERS-CoV, SARS-CoV                         | In vitro-cells | [52]    |
| Imatinib           | Antineoplastic      | MERS-CoV                                   | In vitro-cells | [52]    |
| Ivermectin         | Antiparasitic       | SARS-CoV-2                                 | In vitro-cells | [58]    |
| Loperamide         | Antidiarrheal       | MERS-CoV, SARS-CoV                         | In vitro-cells | [52,57] |
| Lycorine           | Research            | MERS-CoV                                   | In vitro-cells | [52,57] |
| Mefloquine         | Antimalarial        | MERS-CoV                                   | In vitro-cells | [52,57] |
| Methotrimeprazine  | Antipsychotic       | MERS-CoV, SARS-CoV                         | In vitro-cells | [52,57] |
| Mofetil            | Immunosuppressant   | MERS-CoV                                   | In vitro-cells | [50]    |
| Monensin           | Antibacterial (vet) | HCoV-OC43, HCoV-NL63,<br>MERS-CoV, MHV-A59 | In vitro-cells | [50]    |
| Mycophenolic acid  | Immunosuppressant   | HCoV-OC43, HCoV-NL63,<br>MERS-CoV, MHV-A60 | In vitro-cells | [50]    |
| Niclosamide        | Anthelmintic        | SARS-CoV                                   | In vitro-cells | [51]    |
| Nitazoxanide       | Antiprotozoal       | SARS-CoV-2                                 | In vitro-cells | [56]    |
| Omacetaxine        | Antineoplastic      | MERS-CoV, SARS-CoV                         | In vitro-cells | [52]    |

|                  |                |                                         |                |             |
|------------------|----------------|-----------------------------------------|----------------|-------------|
| Phenazopyridine  | Anesthetic     | HCoV-OC43, HCoV-NL63, MERS-CoV, MHV-A60 | In vitro-cells | [50]        |
| Promethazine     | Antihistamine  | MERS-CoV, SARS-CoV                      | In vitro-cells | [52,57]     |
| Pyrvinium        | Anthelmintic   | MERS-CoV                                | In vitro-cells | [50]        |
| Remdesivir       | Antiviral      | SARS-CoV                                | In vitro-cells | [56]        |
| Sotrastaurin     | Research       | MERS-CoV, SARS-CoV                      | In vitro-cells | [52,57]     |
| Tamoxifen        | Antineoplastic | MERS-CoV, SARS-CoV                      | In vitro-cells | [52]        |
| Terconazole      | Antifungal     | MERS-CoV, SARS-CoV                      | In vitro-cells | [52]        |
| Thiethylperazine | Antiemetic     | MERS-CoV                                | In vitro-cells | [50]        |
| Thiothixene      | Antipsychotic  | MERS-CoV, SARS-CoV                      | In vitro-cells | [52]        |
| Toremifene       | Antineoplastic | MERS-CoV                                | In vitro-cells | [52,53, 57] |
| Trifluoperazine  | Antidepressant | MERS-CoV, SARS-CoV                      | In vitro-cells | [52,57]     |
| Triparanol       | Retired        | MERS-CoV, SARS-CoV                      | In vitro-cells | [52]        |
| Valinomycin      | Research       | SARS-CoV                                | In vitro-cells | [51]        |
| Lopinavir        | Antiviral      | HCoV-OC43, HCoV-NL63, MERS-CoV, MHV-A59 | Clinical use   | [50]        |

|                  |                            |            |                        |      |
|------------------|----------------------------|------------|------------------------|------|
| Ribavirin        | Antiviral                  | MERS-CoV   | Clinical use           | [50] |
| Saracatinib      | Research                   | MERS-CoV   | Clinical use           | [50] |
| 6-Mercaptopurine | Antineoplastic             | MERS-CoV   | In vitro-free cells    | [50] |
| 6-Thioguanine    | Antineoplastic             | MERS-CoV   | In vitro-free cells    | [50] |
| Disulfiram       | Prevent alcohol dependency | MERS-CoV   | In vitro-free cells    | [50] |
| N-ethylmaleimide | Research                   | MERS-CoV   | In vitro-free cells    | [50] |
| Nutlin-3A        | Research                   | MERS-CoV   | In vitro-free cells    | [50] |
| Benztropine      | Anticholinergic            | SARS-CoV-2 | Computational proposal | [55] |

---

**Table S2.** Reference compounds with proven activity against Mpro and PLpro of SARS-CoV-2

| Compound         | IC <sub>50</sub> against SARS-CoV-2 Mpro (μM) | IC <sub>50</sub> against SARS-CoV-2 PLpro (μM) | Reference |
|------------------|-----------------------------------------------|------------------------------------------------|-----------|
| Amodiaquine      | No reported                                   | 19.85                                          | [67]      |
| Baicalin         | 6.41                                          | 177.6                                          | [64, 69]  |
| Baricitinib      | 25.31                                         | No reported                                    | [63]      |
| Chlorogenic acid | 29.48                                         | 0.54                                           | [66]      |
| Cinanserin       | 124.93                                        | No reported                                    | [62]      |
| Glycyrrhizin     | < 30                                          | No reported                                    | [61]      |
| Ivermectin       | 21.53                                         | No reported                                    | [60]      |
| Loperamide       | No reported                                   | 33.5                                           | [65]      |
| Niclosamide      | 18.7                                          | 16.6                                           | [59]      |
| Tamoxifen        | No reported                                   | 41.0                                           | [59]      |
| 6-Mercaptopurine | No reported                                   | 21.6                                           | [68]      |
| 6-Thioguanine    | No reported                                   | 5.0                                            | [68]      |
| Disulfiram       | 2.1                                           | No reported                                    | [70]      |

**Table S3.** Compounds evaluated experimentally.

| Internal ID | ZINC15 ID    | SMILES                                                                         | Supplier            | Cat. number |
|-------------|--------------|--------------------------------------------------------------------------------|---------------------|-------------|
| 1           | ZINC66987    | <chem>CN(C)C1=CC=C(C=C1)C2NC3=CC=CC4=C3C(=CC=C4)N2</chem>                      | Vitas M Chemical    | STK005051   |
| 2           | ZINC299345   | <chem>C1=CC=C(C=C1)OC(=O)C2=CC=CC=C2OC(=O)C3=CC=CO3</chem>                     | Vitas M Chemical    | STK388138   |
| 3           | ZINC600324   | <chem>COC1=CC2=C(C=C1)SCCN(C2)C(=O)CCN3CCC(CC3)CC4=CC=CC=C4</chem>             | Sigma-Aldrich       | SML0549     |
| 4           | ZINC3313600  | <chem>CN1CCCN(CC1)S(=O)(=O)C2=CC3=CC=CC=C3C=C2</chem>                          | Enamine             | Z45547537   |
| 5           | ZINC3861553  | <chem>CN(C)C1=CC=C(C=C1)C(C2=CC=C(C=C2)N(C)C)C3=CC=C(C=C3)N(C)C</chem>         | TargetMol           | T1343       |
| 6           | ZINC4272012  | <chem>CN(C)C1=CC=C(C=C1)C(C2=CC=CC=C2)C3=CC=C(C=C3)N(C)C</chem>                | MedChemExpress      | HY-D0300    |
| 7           | ZINC4759224  | <chem>CN(C)C1=CC=C(C=C1)C(=O)N(CC2=CC=CC=C2)CC3=CC=CC=C3</chem>                | Chembridge          | P-7363096   |
| 10          | ZINC8579480  | <chem>CCN(CC1=CC2=CC=CC=C2NC1=O)C(=O)C3=CN=CC=C3</chem>                        | Vitas M Chemical    | STL038212   |
| 11          | ZINC9435742  | <chem>CC1=CC2=C(C(=CC(=O)O2)C)C(=C1)OCC(=O)N3CCC(CC3)(C4=CC=C(C=C4)Cl)O</chem> | Vitas M Chemical    | STK608237   |
| 13          | ZINC13878776 | <chem>CC1=CC(=C(C(=O)N1)[N+](=O)[O-])OC(=O)C2=CC3=CC=CC=C3C=C2</chem>          | Life Chemicals Inc. | F1826-0081  |
| 13a         | ZINC4248385  | <chem>CC1=CC(=C(C(=O)N1)[N+](=O)[O-])OC(=O)C2=CC=CC3=CC=CC=C32</chem>          | Life Chemicals Inc. | F1826-0080  |
| 13b         | ZINC13523222 | <chem>CC1=CC=C(C=C1)C(=O)OC2=C(C(=O)NC(=C2)C)[N+](=O)[O-]</chem>               | Life Chemicals Inc. | F1826-0032  |
| 13c         | ZINC4248365  | <chem>CC1=CC(=C(C(=O)N1)[N+](=O)[O-])OC(=O)C2=CC=C(C=C2)Br</chem>              | Life Chemicals Inc. | F1826-0059  |
| 14          | ZINC19360158 | <chem>COC1=CC=CC=C1CN2CCN(CC2)CC3=CC4=CC=CC=C4C=C3</chem>                      | Vitas M Chemical    | STK145318   |
| 18          | ZINC19782432 | <chem>CC(C)CC(=O)N1CCN(CC1)CC2=CC3=CC=CC=C3C=C2</chem>                         | Asinex              | P-596350389 |

**Table S4.** Molecular docking scores of compounds **13–13c**

| Compound   | Score (kcal/mol) |
|------------|------------------|
| <b>13</b>  | -6.83            |
| <b>13a</b> | -6.81            |
| <b>13b</b> | -6.41            |
| <b>13c</b> | -6.67            |

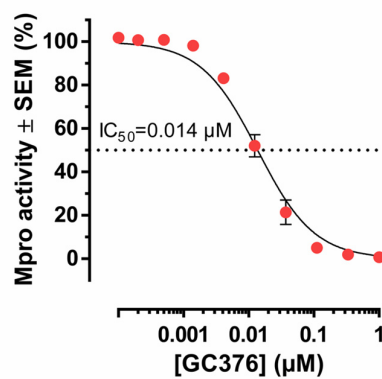

**Figure S1.** Concentration–response curve for the reported Mpro inhibitor GC376 in our FRET assay. A representative assay from two performed is shown.



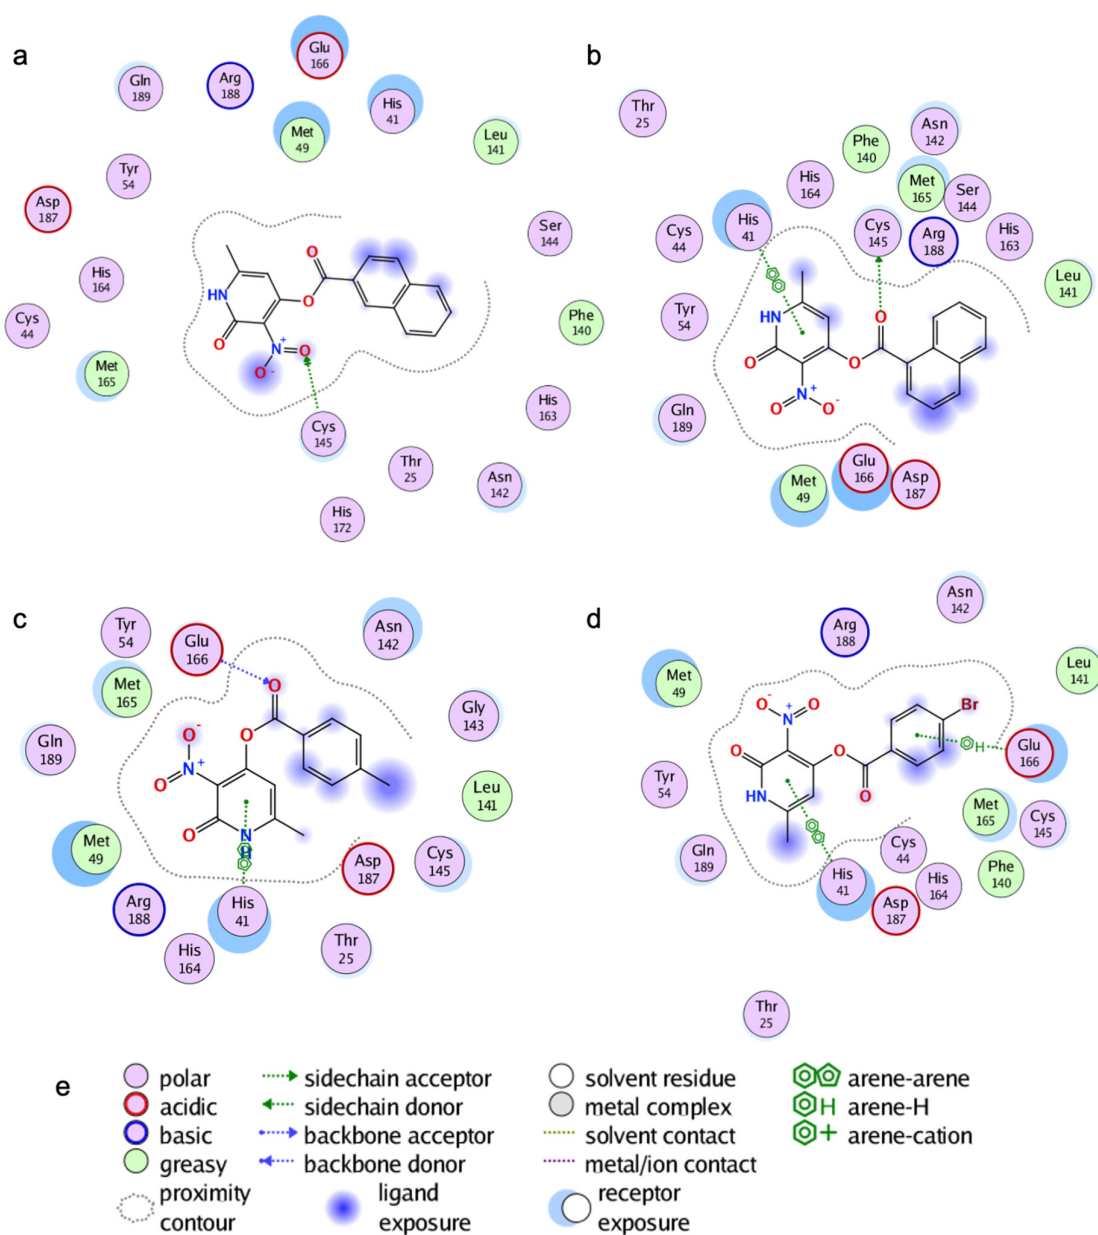

**Figure S2.** Binding mode of identified Mpro inhibitors predicted by molecular docking for the compound **13** (a), **13a** (b), **13b** (c), and **13c** (c). Nomenclature for two-dimensional interaction diagrams (e).

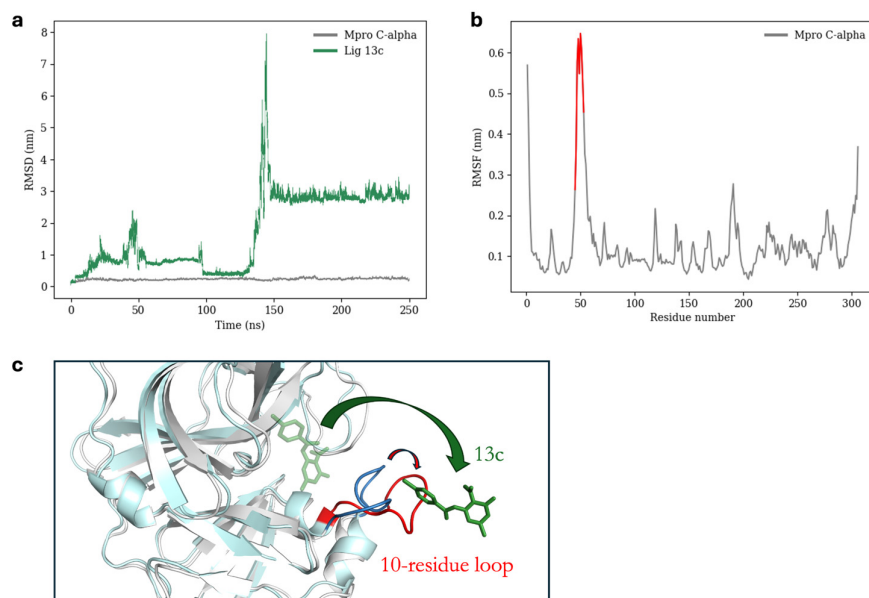

**Figure S3. Molecular dynamics simulation of SARS-CoV-2 Mpro/13c complex.** (a) Root Mean Square Deviation (RMSD) of ligand **13c** (green line) and Mpro (gray line). Mpro RMSD was  $2.32 \pm 0.31$  Å. (b) Root Mean Square Fluctuation (RMSF) of Mpro alpha-carbons. Values for residues 43 to 54, corresponding to a loop with high fluctuation, are highlighted in red. (c) Comparison of enzyme-ligand complex at initial conformation (Mpro: white cartoon, 43-54 loop: blue, ligand: transparent green) and after 45 ns of simulation (Mpro: pale cyan cartoon, 43-54 loop: red, ligand: solid green). Arrows indicate temporal evolution.

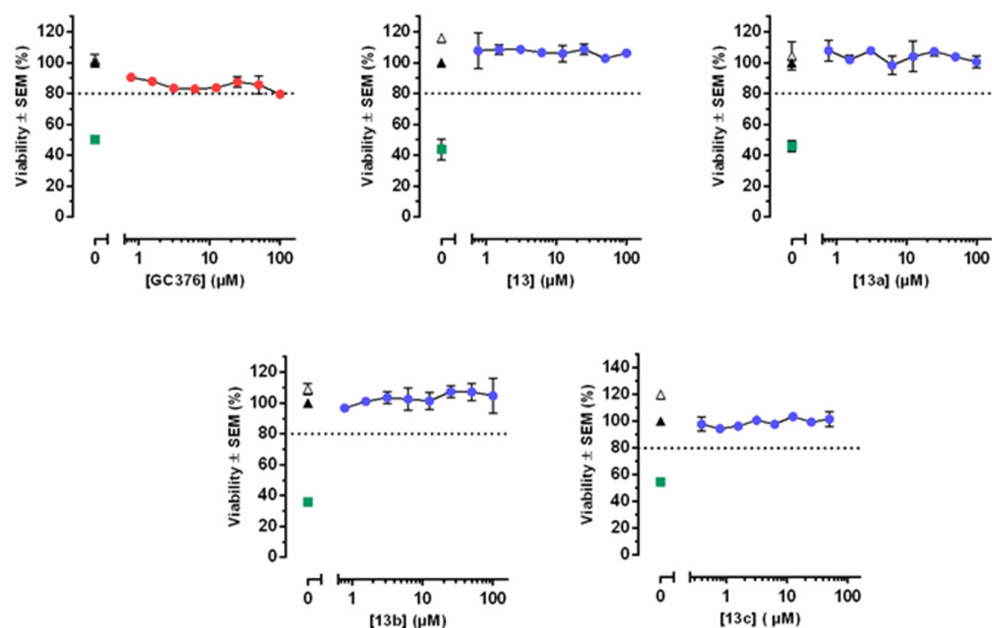

**Figure S4.** Cytotoxicity of SARS-CoV-2 Mpro inhibitors on CCL81 Vero cells exposed for 72 h to the selected compounds. Concentration-response curves for GC376 (0.078-10  $\mu$ M), 13-13b (0.78-100  $\mu$ M) and **13c** (0.39-50  $\mu$ M). Data were normalized against the corresponding vehicle control (▲). Vehicle was DMSO 0.2% for GC376, **13**, **13a**, **13b**, and DMSO 0.5% for **13c**. Plots show the mean  $\pm$  the standard error of the mean (SEM) from three independent experiments. All experiments included cells without treatment ( $\Delta$ ), and the cytotoxic drug doxorubicin 2.5  $\mu$ M (■) as positive control.

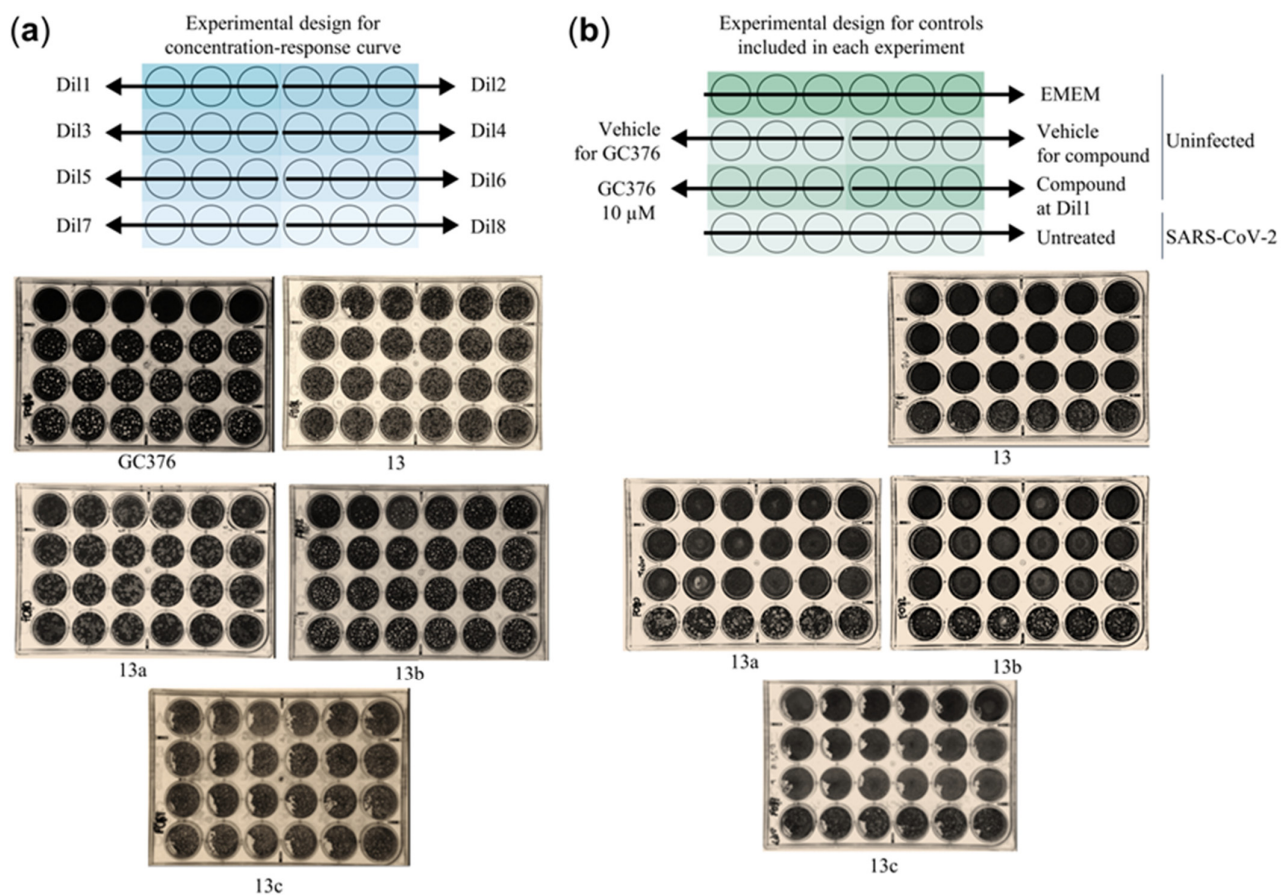

**Figure S5.** Cytopathic effect elicited by SARS-CoV-2 on cell cultures treated with Mpro inhibitors. **(a)** Representative Vero CCL8 cultures showing the cytopathic effect elicited by SARS-CoV-2 (72 h) in presence of compounds **13**–**13c** or the positive control GC376. The arrangement of the plate is shown at the top: Dil: dilution. **(b)** Representative Vero CCL8 cultures employed as controls. These control plates were run simultaneously than those shown in A.
